# Supplementary material for: Improving the performance of a LiFePO4 cathode based on electrochemically cleaved graphite oxides with high hydrophilicity and good conductivity
Source: Royal Society of Chemistry journal article supplement (doi:10.1039/c3ta10736a), 2013-01-01
Supplement: c3ta10736a.pdf [file c3ta10736a.pdf]

## Supplementary Information for

### **Improving the performance of LiFePO<sub>4</sub> cathode based on the electrochemical cleavage graphite oxide with high hydrophilicity and good conductivity**

*Yongzhi Zhang, Li Chen, Junke Ou, Jun Wang, Baozhan Zheng, Hongyan Yuan, Yong Guo\*, and Dan Xiao\**

<sup>a</sup> *College of Chemistry, 29 Wangjiang Road, Chengdu 610064, China.*

<sup>b</sup> *College of Chemical Engineering, Sichuan University, 29 Wangjiang Road, Chengdu 610064, China*

*\*Corresponding author.*

*Tel: +86-28-85416218; fax: +86-28-85412907. E-mail address:  
guoy@scu.edu.cn (Yong Guo)*

*Tel: +86-28-85416029; fax: +86-28-85415029. E-mail address:  
xiaodan@scu.edu.cn (Dan Xiao).*

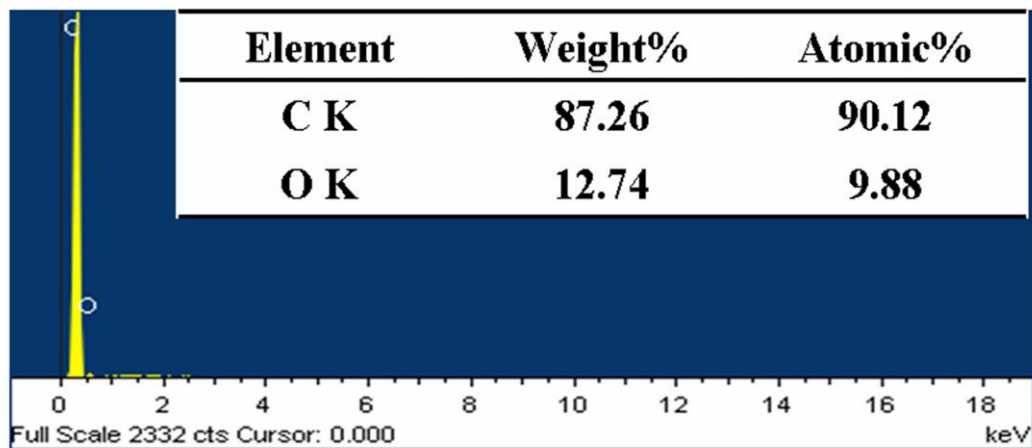

**Fig. S1** EDS of ECGO, the table (inset) displays the relative content of carbon and oxygen.

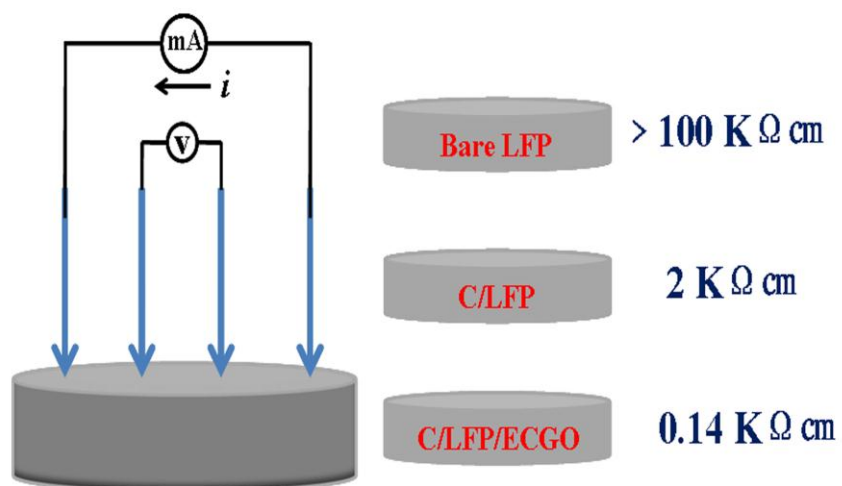

**Fig. S2** Schematic diagram of bulk conductivity of bare LFP, C/LFP and C/LFP/ECGO measured by four point probe.

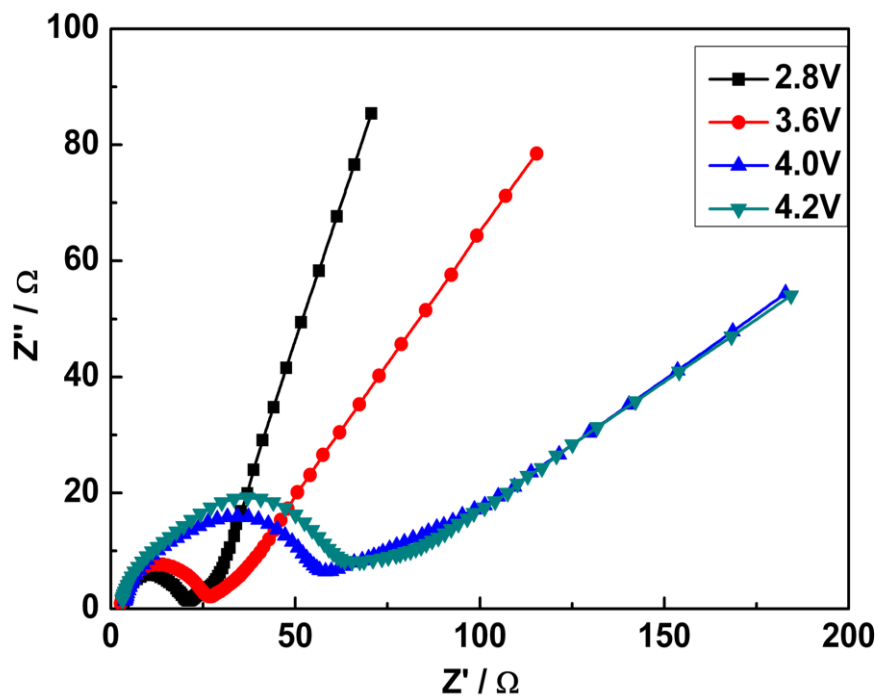

**Fig. S3** Impedance spectra of C/LFP/ECGO vs Li at various voltages during the 10th charge-cycle in the range of 2.2 - 4.2 V at 0.2C

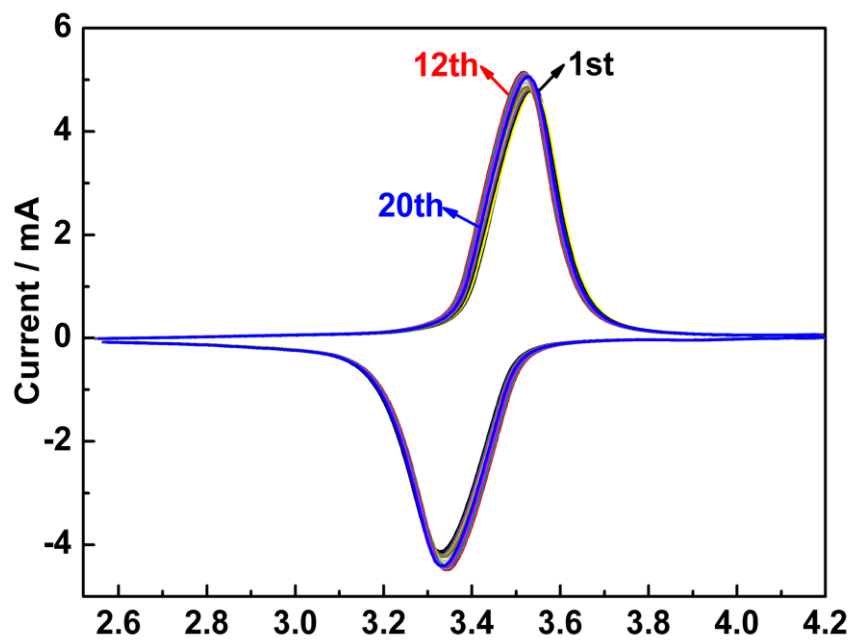

**Fig. S4** Cyclic voltammograms of C/LFP/ECGO at a scan rate of 0.1 mV s<sup>-1</sup> from the 1<sup>st</sup> to the 20<sup>th</sup> cycle.
